# 1 **wrmXpress: A modular package for high-throughput** 2 **image analysis of parasitic and free-living worms**

3  
4 Nicolas J. Wheeler<sup>1</sup>, Elena J. Garncarz<sup>1</sup>, Kendra J. Gallo<sup>1</sup>, John D. Chan<sup>1,2</sup>, Mostafa Zamanian<sup>1\*</sup>

5  
6 <sup>1</sup> Department of Pathobiological Sciences, University of Wisconsin-Madison, Madison, WI USA

7 <sup>2</sup> Department of Chemistry, University of Wisconsin-Oshkosh, Oshkosh, WI USA

8 \* [mzamanian@wisc.edu](mailto:mzamanian@wisc.edu)

## 9 **Abstract**

10 Advances in high-throughput and high-content imaging technologies require concomitant  
11 development of analytical software capable of handling large datasets and generating relevant  
12 phenotypic measurements. Several tools have been developed to analyze drug response  
13 phenotypes in parasitic and free-living worms, but these are siloed and often limited to specific  
14 instrumentation, worm species, and single phenotypes. No effort has been made to unify tools  
15 for analyzing high-content phenotypic imaging data of worms and provide a platform for future  
16 extensibility. We have developed wrmXpress, a unified framework for analyzing a variety of  
17 phenotypes matched to high-content experimental assays of free-living and parasitic nematodes  
18 and flatworms. We demonstrate its utility for analyzing a suite of phenotypes, including motility,  
19 development/size, and feeding, and establish the package as a platform upon which to build  
20 future custom phenotypic modules, including those that incorporate deep learning techniques.  
21 We show that wrmXpress can serve as an analytical workhorse for anthelmintic screening  
22 efforts across schistosomes, filarial nematodes, and free-living model nematodes, and holds  
23 promise for enabling collaboration among investigators with diverse interests.

## 24 **Introduction**

25 The past decade has seen the development of a variety of software for the acquisition and  
26 analysis of high-throughput and high-content imaging data of roundworms and flatworms, both  
27 free-living and parasitic [1,2]. New instrumentation and analytical capabilities have laid the  
28 foundation for a new era of phenotype-driven screening for anthelmintic compounds.

29  
30 Early iterations of image-based screening focused on gross worm movement, using a number of  
31 different approaches to quantify movement, including sparse measures of optical flow and  
32 frame-by-frame pixel variation [3–7]. Optical flow was found to be robust to a number of diverse  
33 nematode and flatworm parasites and has been the basis for some of the largest phenotypic  
34 screening efforts to-date [8–10]. Other developments in high-content imaging, sometimes  
35 combined with the employment of fluorescent stains to reveal fine-scale phenotypes, now allow  
36 for the quantification of detailed morphological and molecular features that can be used for  
37 image-based classification strategies [11–14]. Open-source packages have been developed to  
38 more readily handle large imaging datasets and provide quick readouts for quality control of  
39 entire experiments, plates, wells, and even individual worms [15].

40  
41 Not unexpectedly, individual labs often develop their pipelines to suit their own needs. These  
42 pipelines tend to focus on specific species and stages, require specific instrumentation, and  
43 demand an advanced grasp of compiled languages, resulting in siloed development and  
44 redundant rather than collaborative engineering efforts. There have been recent developments  
45 that unify parts of these efforts for the capture of phenotypes in model nematode species [15].  
46 No package has yet to bring multiple phenotypes (i.e., motility and morphology) into a single  
47 framework that prioritizes flexibility across free-living and parasitic worms. Here, we present  
48 wrmXpress, a modular open-source package that consolidates multiple analytical approaches. It  
49 is written entirely in popular, open-source, interpreted programming languages (Python and R)  
50 and is configured with a human-readable markup language (YAML). It is containerized for  
51 deployment across a wide variety of compute platforms (both distributed and isolated), enabling  
52 collaboration and reproducibility. Finally, while it ships with a range of phenotype pipelines, it  
53 establishes a foundation for extension to additional analyses and species, including future  
54 image-based deep learning applications.

## 55 **Methods**

### 56 **Protocol and data availability**

57 wrmXpress v1.0.0 is publicly available at <https://github.com/zamarianlab/wrmXpress> and  
58 includes a Conda environment file to install dependencies. A Docker image that includes all  
59 dependencies is publicly available at <https://hub.docker.com/r/zamarianlab/chtc-wrmxpress>.  
60 Example imaging data for each module is available as a Zenodo repository  
61 (10.5281/zenodo.6558304) .

### 62 **Image acquisition and analysis**

63 Images were acquired with an ImageXpress Nano (Molecular Devices). *Caenorhabditis elegans*  
64 was imaged at 2x with transmitted light and GFP/TxRed where applicable. For *Brugia malayi*  
65 microfilariae motility, 10 frames were acquired at 4x with transmitted light with the field of view  
66 focused on the center of the well; for *B. malayi* microfilariae viability, wells were imaged at 4x  
67 with excitation at 472 nm, tiled 2x2 to acquire the entire well. For *S. mansoni* adult motility, wells  
68 were acquired for 60 frames at 2x with transmitted light and 2x binning.

69  
70 Raw images were exported with MetaXpress v6 and stored on the UW-Madison Research Drive  
71 in an uncompressed state. When analyzed using a distributed computing system, images were  
72 transferred to the UW-Madison Center for High-Throughput Computing (CHTC) submit servers.  
73 Jobs were submitted and managed with HTCondor [16]. HTCondor submit scripts are publicly  
74 available at <https://github.com/zamarianlab/chtc-submit/tree/main/imgproc>.

## 75 **Worm classification model building**

76 Straightened worm images from 6 different experiments were manually classified as Single  
77 worm, Partial worm, Multiple worms, or Debris. Each image was associated with 24  
78 morphological features output by CellProfiler, and the features and training data were used to  
79 build several classification models using a variety of approaches, including the boosted  
80 frameworks XGBoost[17,18] and LightGBM [19]. These were implemented using the tidymodels  
81 package in the R statistical software [20]. Highly correlated predictors and predictors with near-  
82 zero variance were removed, leaving 5 final predictors (bounding box minimum x and y, solidity,  
83 minor axis length, and compactness). The unbalanced dataset was upsampled with the SMOTE  
84 method [21]. Data was split into training/testing sets, and the training results were evaluated  
85 using 10-fold cross validation. Model hyperparameters were tuned using grid searches. Tuned  
86 models were finally fit to the cross-fold testing set and evaluated using the area under the  
87 receiver-operator curve (ROC AUC).

## 88 **Results**

### 89 **wrmXpress is user-friendly, modular, and extensible**

90 wrmXpress is a unified framework for analyzing worm imaging data. It comes packaged with a  
91 variety of phenotyping modules matched to specific experimental setups, including motility and  
92 viability for parasites and *C. elegans*, and feeding rate and development in *C. elegans*. The  
93 package is easily extensible using open-source Python libraries or new CellProfiler pipelines.  
94

95 The package combines code, user-generated job parameters, and input data/metadata (Fig 1),  
96 each of which is passed to a Docker container that runs the pipeline. It is implemented with a  
97 single command (e.g., `python wrmXpress/wrapper.py params.yml {plate_dir}`),  
98 and modules are configured and initialized with the YAML parameters file that designates the  
99 species, worm stage, and the modules to be run (Fig 2A). A user can choose to analyze the  
100 entire 96-well plate or a selected subset of wells. The `wrapper.py` script integrates these  
101 selections and runs the proper modules and commands (Fig 2B). Output data is written to a  
102 directory with raw output, a tidied output that joins well-based experimental metadata, and  
103 thumbnail images to assist with quality control and error diagnosis (Fig 2C).  
104

105 **Figure 1. Schematic of wrmXpress.** wrmXpress consists of code that is held in a public  
106 GitHub repository (including the master wrapper script), job parameters that are edited locally,  
107 and external data and metadata. The structure of input data and metadata requires specific  
108 formats in order for wrmXpress to complete without error.  
109

110 **Figure 2. Constituents of the wrmXpress workflow.** (A) Jobs are parameterized with a user-  
111 generated YAML file, which includes species and stage information, and allows for the selection  
112 of Python or CellProfiler modules. (B) The wrapper scripts control the implementation of  
113 wrmXpress. (C) Output data includes raw data, raw data with joined metadata, and diagnostic  
114 thumbnail images. (D) wrmXpress comes packaged with 5 distinct analytical modules.

## 115 **wrmXpress usage**

116 wrmXpress is designed such that each module outputs a single phenotypic value per well, or  
117 multiple values per well or object if using a CellProfiler pipeline. For instance, for a motility  
118 experiment that could use worm area as a normalization coefficient, both the motility and  
119 segmentation modules can be selected, which will calculate the raw optical flow and total worm  
120 area per well. Each value is then concatenated to a final output file that includes metadata and  
121 per-module measurements.

122  
123 At the start of a wrmXpress run, the user-generated parameters provided by the YAML are read  
124 and organized (Fig 2B, step 1). Paths to relevant image and metadata files are populated, and  
125 modules are selected (Fig 2B, step 2). It is during this stage that wells of interest can be  
126 selected in order to reduce runtime in case of contamination, empty wells, or during testing.  
127 Since not all modules are compatible (for instance, some require multiple time points and some  
128 require multiple wavelengths), some light checking of parameters and input data is performed in  
129 order to avoid module clashes and to ensure a correct pairing between modules and input data.  
130 Finally, the plate's HTD file, a machine-generated configuration file that reports imager settings,  
131 is parsed (Fig 2B, step 3). These imager configurations are used in some downstream modules,  
132 like stitching of tiled images.

133  
134 Once paths and parameters are organized, the wrapper script loops through the selected wells  
135 and iteratively calls the functions for each selected module (Fig 2B, step 4). For Cell Profiler  
136 pipelines, an R script utilizes the populated file paths to automatically generate the CSV that is  
137 used by CellProfiler's LoadData module. CellProfiler is then called in headless mode. Each  
138 pipeline must also include the ExportToSpreadsheet module, which collects the well and/or  
139 object-based data and writes it to a CSV. Finally, another R script joins user-provided  
140 experimental metadata to the output CSV to create a final tidy data file.

141  
142 For bespoke Python modules, less preparation is required. As the wrapper iterates through  
143 wells, each module is called independently of other modules. After completion of a well, the  
144 module will return a single phenotypic value, which is added to a dictionary of values that is  
145 dynamically updated. After iterating through all selected wells, the dictionary is written to a CSV,  
146 and the data is tidied as above.

147  
148 After Cell Profiler pipelines or Python modules are finished, diagnostic thumbnails are generated  
149 and formatted in a 12x8 array. By default, a thumbnail will be created for each included  
150 wavelength, and specific modules generate relevant diagnostics to help evaluate module  
151 performance.

## 152 **Analytical modules for worm motility, area, development, viability and** 153 **feeding**

154 wrmXpress comes packaged with five individual modules that enable a wide range of out-of-the-  
155 box functionalities (Fig 2D). Motility measurements are implemented using a dense measure of  
156 optical flow (Farneback's method [22]). Dense flow for worm motility has been used elsewhere

157 [10], and offers a richer output than previous optical flow-based implementations that prioritized  
158 a sparse feature set (the Lucas-Kanade method [23]). Focusing on a sparse feature set enabled  
159 real-time tracking of worms [3,4], but given that real-time tracking is not a priority in high-  
160 throughput approaches, wrmXpress opts for the more data-rich option. A unitless measure of  
161 motility is calculated by summing the magnitude of the flow vectors across  $n-1$  frames, and then  
162 summing the sum across all pixels. Thus, flow is a function of video length as well as each  
163 frame's height and width. This algorithm has been tested for *Brugia* spp. microfilariae, *C.*  
164 *elegans* L1s and adults, and *S. mansoni* adult males and females (Fig 3A-C). A "flow cloud"  
165 diagnostic thumbnail is created for each well, providing an image representation of the motility  
166 over the entire course of the video. When multiple worms are included per well, this diagnostic  
167 can also alert investigators to plate effects or heterogeneity between wells.

168  
169 **Figure 3. Examples of phenotypes that can be analyzed with wrmXpress.** (A) Motility of *B.*  
170 *malayi* microfilariae, *C. elegans* adults, and *S. mansoni* adults. Diagnostic images include a  
171 single frame of transmitted light, binary segmented worms, and a flow cloud. (B) Development  
172 of *C. elegans*, which is amenable for staged adults and larvae, as well as wells with mixed  
173 populations. Classification of transgenic worms (*unc-122p::GFP*) is also implemented. (C)  
174 Quantification of *C. elegans* feeding using fluorescent dyes, which can be measured in the worm  
175 intestine.

176  
177 Motility measurements on wells with multiple worms can be normalized by dividing the motility  
178 value by the worm area, which is calculated by the segmentation module. We have found that a  
179 simple algorithm incorporating Sobel edge detection, Gaussian blur, and Otsu's thresholding  
180 method performs well for a variety of vermiform objects (including all nematodes so far tested)  
181 [24,25]. For larger worms that are less optically translucent (e.g., *S. mansoni* adults), we  
182 implement Gaussian blur followed by a simple percentile threshold. The percentile and  $\sigma$  for the  
183 Gaussian kernel may need to be adjusted in accordance with varying illumination parameters,  
184 but the defaults have been robust in our hands (1.5% and  $\sigma = 1.5$ ). For *S. mansoni* adult  
185 females or male/female pairs, which eject a variety of debris in culture, an object size filter has  
186 been implemented. The final binary segmented image is also written out as a diagnostic  
187 thumbnail (Fig 3).

188  
189 We have used a similar segmentation algorithm for the quantification of female *Brugia* spp.  
190 fecundity. Though a fecundity module has not technically been integrated into wrmXpress, the  
191 segmentation module can be used for a variety of end user needs.

192  
193 Integration of CellProfiler pipelines further extends the capabilities of wrmXpress, which comes  
194 with pre-built pipelines for analyzing *C. elegans* development and feeding, each of which can be  
195 used on mixed populations of transgenic worms with a fluorescent marker (Fig 3B-C). These  
196 pipelines take advantage of the WormToolbox plugin, which incorporates user-generated worm  
197 models to segment and untangle individual worms [11]. For the development module, a number  
198 of innovations were necessary to prepare the pipeline for identifying and retaining worms that  
199 greatly varied in size, as drug treatment of synchronized worms can lead to mixed populations  
200 of worms in a single well (Fig 3B). Relaxation of the segmentation algorithm predictably led to  
201 the inclusion of more debris as objects, so we trained a post-processing classification model

202 that used object shape and intensity features as predictors to classify untangled worms as a  
203 single worm, partial worm, multiple worms, or debris. We tuned, trained, and evaluated a variety  
204 of machine learning models and selected a gradient boosted tree due to its performance and  
205 speed of classification on experimental data (Fig 4A). The trained model used solidity (the ratio  
206 of the contour area to its convex hull area) and compactness (the ratio of the worm area to the  
207 area of its smallest bounding box) as the most important variables (Fig 4B). When fit to  
208 annotated holdout data, the model removed 90% of the debris, 80% of multiple worms, 84% of  
209 partial worms, and only 18% of single worms, substantially enriching for objects of interest. In  
210 our hands, using a single, less stringent worm model in CellProfiler followed by filtration post-  
211 processing decreased runtime and ensured that smaller worms were captured. Both models  
212 (the worm model used in CellProfiler and the classification model used in post-processing)  
213 should be trained on user-generated data. Instructions for training the former are available on  
214 the CellProfiler documentation website, and we have included example pipelines for selecting  
215 worms and training the model in the GitHub repository.

216

217 **Figure 4. Statistical models used to classify and filter straightened *C. elegans*.** (A)  
218 Evaluation of models classifying segmented and straightened “worms” as debris, multiple  
219 worms, a partial worm, or a single worm. (B) Variable importance plot for the tuned XGBoost  
220 model from (A). (C) Variable importance plot for a tuned random forest to classify GFP+/- worms  
221 (*unc-122p::GFP*).

222

223 For transgenic worms with fluorescent markers, we also chose to filter during post-processing  
224 rather than implementing a filter in the CellProfiler pipeline. This allows for labeling each worm  
225 as +/- in the final tidied data, providing a convenient within-well control population (transgenic  
226 strains generated with extrachromosomal arrays contain a mix of transgene<sup>+</sup> and transgene<sup>-</sup>  
227 worms). We trained a simple random forest on annotated worms that were labeled with *unc-*  
228 *122p::GFP*, which is fluorescent in only a handful of cells (Fig 4B). This classifier achieved  
229 100% accuracy, and the most important variable in the model was the standard deviation of the  
230 fluorescence intensity (Fig 5C). Internally, we also use this model for classifying pharynx-labeled  
231 (*myo-2p::GFP*) transgenic worms.

232

233 Finally, we include a CellProfiler pipeline for the measurement of staining by a viability dye  
234 (CellTox), which we have used with both microfilariae and adult *C. elegans*. This pipeline uses  
235 similar principles to the segmentation module but is optimized for fluorescent images. The  
236 pipeline will segment stained areas and output a measure of total fluorescence.

## 237 **wrmXpress is readily extensible**

238 wrmXpress can be extended by developing new, isolated modules (e.g., Python scripts) that  
239 take the images from a single well, perform transformations/calculations on them, and output a  
240 single value. For instance, one can easily imagine a Python module that counts segmented  
241 objects in a well. The Python script can be written, added to the `modules/` directory, added to  
242 the `if/else` loop in the wrapper script, and added as an option in the YAML configuration  
243 template. The module will be run independently, enabling safe, backwards-compatible  
244 engineering of new modules.

245  
246 Likewise, new CellProfiler pipelines can also be easily implemented. In this case, a pipeline is  
247 developed in the CellProfiler GUI, exported as a .cppipe file, added to the  
248 cp\_pipelines/pipelines/ directory, and added as an option in the YAML configuration  
249 template. As an additional step, a user must also add an R script that parses the input file  
250 names and generates the CSV file that is read by the LoadData module in CellProfiler.  
251  
252 wrmXpress does not have a GUI and therefore can only be extended by R and Python  
253 developers. However, we have taken great pains to make the addition of Python modules or  
254 CellProfiler pipelines simple and barrier-free. Additionally, we have found that researchers  
255 without programming experience can develop pipelines using the CellProfiler GUI, which can  
256 then be integrated into the wrmXpress framework by novice developers. Lab specific  
257 documentation for extending wrmXpress can be found at  
258 [http://www.zamaniaanlab.org/ZamaniaanLabDocs/pipelines\\_wrmxpress/](http://www.zamaniaanlab.org/ZamaniaanLabDocs/pipelines_wrmxpress/), which may be  
259 instructive.

## 260 **Conclusions and future developments**

261 We view wrmXpress as a part of the next-generation of parasitic worm phenotyping toolkits,  
262 building upon important advances made by WormAssay/Worminator[3,4] and the  
263 WormToolbox[11] and enabled by high-content imaging. The software contains a variety of  
264 analytical modules that are optimized for experiments with worms, and new modules are being  
265 developed. For instance, we are actively experimenting with methods for quantifying adult worm  
266 fecundity by segmenting adults and progeny and using machine learning classifiers to count  
267 distinct classes of objects. We believe this approach will be easily adapted for *C. elegans* and *S.*  
268 *mansoni* and could make use of new culture media that enable *in vitro* fecundity [26].  
269

270 Future developments in high-content phenotyping of worms likely include the utilization of deep  
271 learning frameworks for a variety of phenotypic endpoints. We have observed that drug  
272 treatment of worms can cause diverse, often ephemeral, motile behaviors that can be identified  
273 by eye, but as of yet cannot be classified computationally [10]. We have additionally observed  
274 that drug-induced worm death can result in one of a number of different worm postures, which  
275 we believe is related to drug mechanisms of action, in the same way that drug MoA can be  
276 parsed by classifying behavioral fingerprints in *C. elegans* [27]. Deep learning is well suited for  
277 each of these tasks, and the structure of wrmXpress is such that deep learning modules can  
278 easily be added. Indeed, these extensions are actively being developed.  
279

280 Due to limitations in running CellProfiler in headless mode, wrmXpress cannot currently be run  
281 in parallel (i.e., analyzing individual wells by separate processors). However, high-throughput  
282 screens often generate dozens of plates per day, and wrmXpress is readily capable of analyzing  
283 plates in parallel by submitting separate jobs for each plate (or running separate commands on  
284 a local machine). Indeed, this is our current implementation with HTCondor [16]. However,  
285 future developments of wrmXpress could allow for well-based parallelization, either by changes  
286 to the handling and organization of input data, or by making use of Python's multiple libraries for

287 parallelization. Regardless, in our hands the analysis of a full 96-well plate takes less than 3  
288 hours using relatively modest hardware specifications (4 CPUs, 20 GB RAM).

289  
290 wrmXpress will work out-of-the-box for all datasets generated with an ImageXpress (Molecular  
291 Devices), which is a popular platform for worm labs [13,15,28,29]. For other endpoints, an HTD  
292 file must be provided, and the image data must be structured as in Fig 1. However, the design  
293 of the pipelines is such that adding support for other platforms will be straightforward.

294  
295 wrmXpress v1.0.0 can be downloaded from its public GitHub repository  
296 (<https://github.com/zamanianlab/wrmXpress>), and the Docker container that includes all  
297 dependencies is also available (<https://hub.docker.com/r/zamanianlab/chtc-wrmxpress>).  
298 Documentation can be found at the GitHub repository, and additional developer information can  
299 be found at [http://www.zamanianlab.org/ZamanianLabDocs/pipelines\\_wrmxpress/](http://www.zamanianlab.org/ZamanianLabDocs/pipelines_wrmxpress/).

## 300 **Acknowledgements**

301 This research was performed using the compute resources and assistance of the UW-Madison  
302 Center For High Throughput Computing (CHTC) in the Department of Computer Sciences. The  
303 CHTC is supported by UW-Madison, the Advanced Computing Initiative, the Wisconsin Alumni  
304 Research Foundation, the Wisconsin Institutes for Discovery, and the National Science  
305 Foundation, and is an active member of the OSG Consortium, which is supported by the  
306 National Science Foundation and the U.S. Department of Energy's Office of Science.

## 307 **References**

- 308 1. Zamanian M, Chan JD. High-content approaches to anthelmintic drug screening. *Trends*  
309 *Parasitol.* 2021;37: 780–789.
- 310 2. Herath HMPD, Taki AC, Rostami A, Jabbar A, Keiser J, Geary TG, et al. Whole-organism  
311 phenotypic screening methods used in early-phase anthelmintic drug discovery. *Biotechnol*  
312 *Adv.* 2022;57: 107937.
- 313 3. Marcellino C, Gut J, Lim KC, Singh R, McKerrow J, Sakanari J. WormAssay: a novel  
314 computer application for whole-plate motion-based screening of macroscopic parasites.  
315 *PLoS Negl Trop Dis.* 2012;6: e1494.
- 316 4. Storey B, Marcellino C, Miller M, Maclean M, Mostafa E, Howell S, et al. Utilization of  
317 computer processed high definition video imaging for measuring motility of microscopic  
318 nematode stages on a quantitative scale: “The Worminator.” *Int J Parasitol Drugs Drug*  
319 *Resist.* 2014;4: 233–243.
- 320 5. Partridge FA, Brown AE, Buckingham SD, Willis NJ, Wynne GM, Forman R, et al. An  
321 automated high-throughput system for phenotypic screening of chemical libraries on *C.*  
322 *elegans* and parasitic nematodes. *Int J Parasitol Drugs Drug Resist.* 2018;8: 8–21.
- 323 6. Preston S, Jabbar A, Nowell C, Joachim A, Ruttkowski B, Baell J, et al. Low cost whole-  
324 organism screening of compounds for anthelmintic activity. *Int J Parasitol.* 2015;45: 333–



- 325 343.
- 326 7. Ritler D, Rufener R, Sager H, Bouvier J, Hemphill A, Lundström-Stadelmann B.  
327 Development of a movement-based in vitro screening assay for the identification of new  
328 anti-cestodal compounds. *PLoS Negl Trop Dis*. 2017;11: e0005618.
- 329 8. Weeks JC, Roberts WM, Leasure C, Suzuki BM, Robinson KJ, Currey H, et al. Sertraline,  
330 Paroxetine, and Chlorpromazine Are Rapidly Acting Anthelmintic Drugs Capable of Clinical  
331 Repurposing. *Sci Rep*. 2018;8: 1–17.
- 332 9. Tyagi R, Bulman CA, Cho-Ngwa F, Fischer C, Marcellino C, Arkin MR, et al. An Integrated  
333 Approach to Identify New Anti-Filarial Leads to Treat River Blindness, a Neglected Tropical  
334 Disease. *Pathogens*. 2021;10. doi:10.3390/pathogens10010071
- 335 10. Wheeler NJ, Heimark ZW, Airds PM, Mann A, Bartholomay LC, Zamanian M. Genetic and  
336 functional diversification of chemosensory pathway receptors in mosquito-borne filarial  
337 nematodes. *PLoS Biol*. 2020;18: e3000723.
- 338 11. Wählby C, Kamensky L, Liu ZH, Riklin-Raviv T, Conery AL, O'Rourke EJ, et al. An image  
339 analysis toolbox for high-throughput *C. elegans* assays. *Nat Methods*. 2012;9: 714–716.
- 340 12. McQuin C, Goodman A, Chernyshev V, Kamensky L, Cimini BA, Karhohs KW, et al.  
341 CellProfiler 3.0: Next-generation image processing for biology. *PLoS Biol*. 2018;16:  
342 e2005970.
- 343 13. Paveley RA, Mansour NR, Hallyburton I, Bleicher LS, Benn AE, Mikic I, et al. Whole  
344 organism high-content screening by label-free, image-based Bayesian classification for  
345 parasitic diseases. *PLoS Negl Trop Dis*. 2012;6: e1762.
- 346 14. Chen S, Suzuki BM, Dohrmann J, Singh R, Arkin MR, Caffrey CR. A multi-dimensional,  
347 time-lapse, high content screening platform applied to schistosomiasis drug discovery.  
348 *Commun Biol*. 2020;3: 747.
- 349 15. Nyaanga J, Crombie TA, Widmayer SJ, Andersen EC. easyXpress: An R package to  
350 analyze and visualize high-throughput *C. elegans* microscopy data generated using  
351 CellProfiler. *PLoS One*. 2021;16: e0252000.
- 352 16. Thain D, Tannenbaum T, Livny M. Distributed computing in practice: the Condor  
353 experience. *Concurr Comput*. 2005;17: 323–356.
- 354 17. Chen T, Guestrin C. XGBoost: A Scalable Tree Boosting System. *Proceedings of the 22nd  
355 ACM SIGKDD International Conference on Knowledge Discovery and Data Mining*. New  
356 York, NY, USA: Association for Computing Machinery; 2016. pp. 785–794.
- 357 18. Chen T, He T, Benesty M, Khotilovich V, Tang Y, Cho H, et al. Xgboost: extreme gradient  
358 boosting. *R package version 0 4-2*. 2015;1: 1–4.
- 359 19. Ke G, Meng Q, Finley T, Wang T, Chen W, Ma W, et al. LightGBM: A highly efficient  
360 gradient boosting decision tree. *Adv Neural Inf Process Syst*. 2017;30. Available:  
361 [https://proceedings.neurips.cc/paper/2017/hash/6449f44a102fde848669bdd9eb6b76fa-](https://proceedings.neurips.cc/paper/2017/hash/6449f44a102fde848669bdd9eb6b76fa-Abstract.html)  
362 [Abstract.html](https://proceedings.neurips.cc/paper/2017/hash/6449f44a102fde848669bdd9eb6b76fa-Abstract.html)
- 363 20. Kuhn M, Wickham H. Tidymodels: a collection of packages for modeling and machine

- 364 learning using tidyverse principles. Boston, MA, USA [(accessed on 10 December 2020)].  
365 2020.
- 366 21. Chawla NV, Bowyer KW, Hall LO, Kegelmeyer WP. SMOTE: Synthetic Minority Over-  
367 sampling Technique. *J Artif Intell Res.* 2002;16: 321–357.
- 368 22. Farnebäck G. Two-Frame Motion Estimation Based on Polynomial Expansion. *Image*  
369 *Analysis.* Springer Berlin Heidelberg; 2003. pp. 363–370.
- 370 23. Lucas BD, Kanade T. An iterative image registration technique with an application to stereo  
371 vision. *Proceedings of the 7th international joint conference on Artificial intelligence -*  
372 *Volume 2.* San Francisco, CA, USA: Morgan Kaufmann Publishers Inc.; 1981. pp. 674–679.
- 373 24. Otsu N. A Threshold Selection Method from Gray-Level Histograms. *IEEE Trans Syst Man*  
374 *Cybern.* 1979;9: 62–66.
- 375 25. Kanopoulos N, Vasanthavada N, Baker RL. Design of an image edge detection filter using  
376 the Sobel operator. *IEEE J Solid-State Circuits.* 1988;23: 358–367.
- 377 26. Wang J, Chen R, Collins JJ 3rd. Systematically improved in vitro culture conditions reveal  
378 new insights into the reproductive biology of the human parasite *Schistosoma mansoni*.  
379 *PLoS Biol.* 2019;17: e3000254.
- 380 27. McDermott-Rouse A, Minga E, Barlow I, Feriani L, Harlow PH, Flemming AJ, et al.  
381 Behavioral fingerprints predict insecticide and anthelmintic mode of action. *Mol Syst Biol.*  
382 2021;17: e10267.
- 383 28. Edwards J, Brown M, Peak E, Bartholomew B, Nash RJ, Hoffmann KF. The diterpenoid 7-  
384 keto-sempervirol, derived from *Lycium chinense*, displays anthelmintic activity against both  
385 *Schistosoma mansoni* and *Fasciola hepatica*. *PLoS Negl Trop Dis.* 2015;9: e0003604.
- 386 29. Giuliani S, Silva AC, Borba JVV, Ramos PIP, Paveley RA, Muratov EN, et al.  
387 Computationally-guided drug repurposing enables the discovery of kinase targets and  
388 inhibitors as new schistosomicidal agents. *PLoS Comput Biol.* 2018;14: e1006515.
- 389

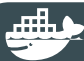

Docker container  
chtc-wrmXpress:v3

## GitHub repository

zamanianlab/wrmXpress v0.3.1

## Wrapper script

Remote

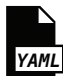

## Job parameters

Local

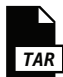

## input.tar

```
{Plate ID}/  
  TimePoint_1/  
    {Plate ID}_A01_s1.TIF  
  ...  
  ...
```

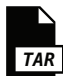

## metadata.tar

```
{Plate ID}/  
  species.csv  
  strains.csv  
  stages.csv  
  treatment.csv  
  conc.csv  
  {User defined}.csv
```

Data

## A Job parameters

```
species:
  - Bma

stages:
  - mf

modules:
  motility:
    run: True

  convert:
    run: True
    save_video: False
    rescale = 0.25

  segment:
    run: True
    wavelength:
      - w1

wells:
  - All
```

## B Wrapper script

```
1. read_parameters()

2. initialize_paths_to_images()

3. read_HTD()

4. if 'cellprofiler' in modules:
    Rscript generate_filelist.R
    cellprofiler {module}.cppipe {filelist}
    tidy_data = Rscript metadata_join_master.R
    tidy_data.to_csv()

    else:
    for well in wells:
        if {module} in modules:
            well_data = run_module()
            out_data[well].append(well_data)

            tidy_data = Rscript metadata_join_master.R
            tidy_data.to_csv()

5. generate_thumbnails()
```

## C Output

```
output.tar
  {Plate ID}
    {Plate ID}_data.csv
    {Plate ID}_tidy.csv
  thumbs/
    {Plate ID}_w1.png
  ...
```

## D zamanianlab/wrmXpress v0.3.1

### Supported modules + diagnostic thumbnails

|                                       |                                                                        |
|---------------------------------------|------------------------------------------------------------------------|
| <u>Python</u>                         | <u>Cell Profiler</u>                                                   |
| Optical flow<br>{Plate ID}_flow.png   | Development<br>{Plate ID}_w1.png                                       |
| Segmentation<br>{Plate ID}_binary.png | Viability<br>{Plate ID}_w1.png                                         |
|                                       | Feeding<br>{Plate ID}_w1.png<br>{Plate ID}_w2.png<br>{Plate ID}_w3.png |

## A Motility

Microfilariae

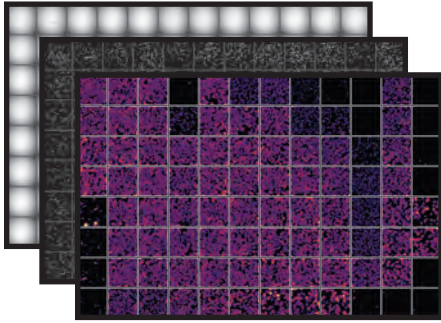

*C. elegans*

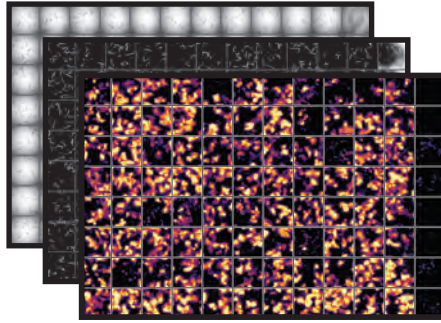

*S. mansoni*

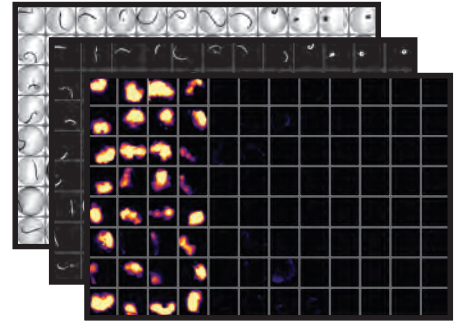

## B Development

Adults

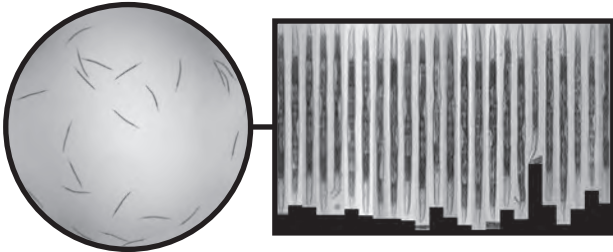

Larvae

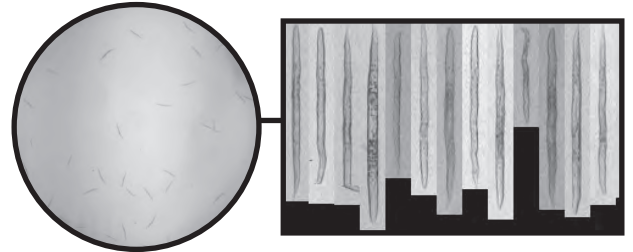

Mixed

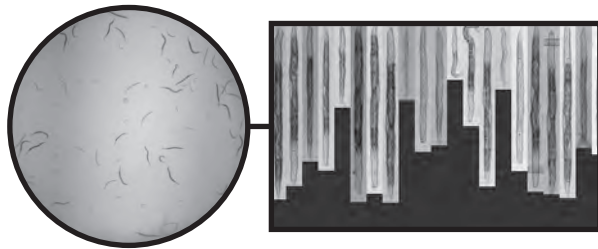

Transgenic

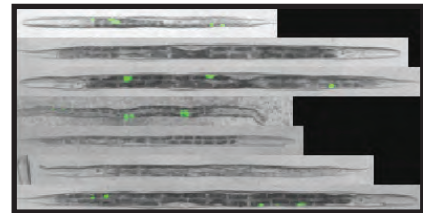

## C Feeding

Untreated

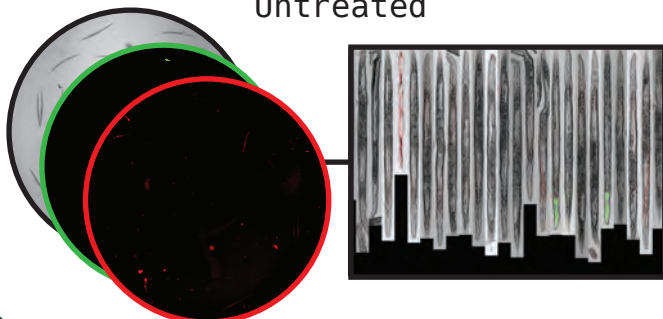

Treated

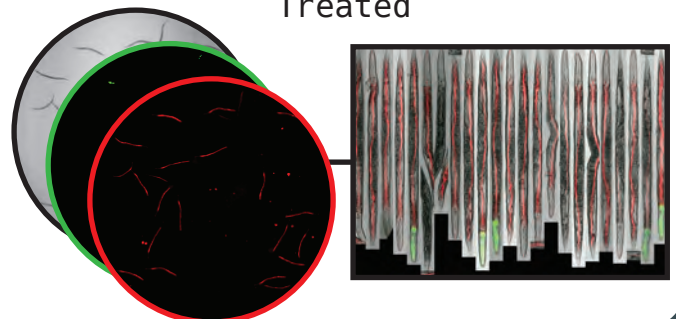

**A**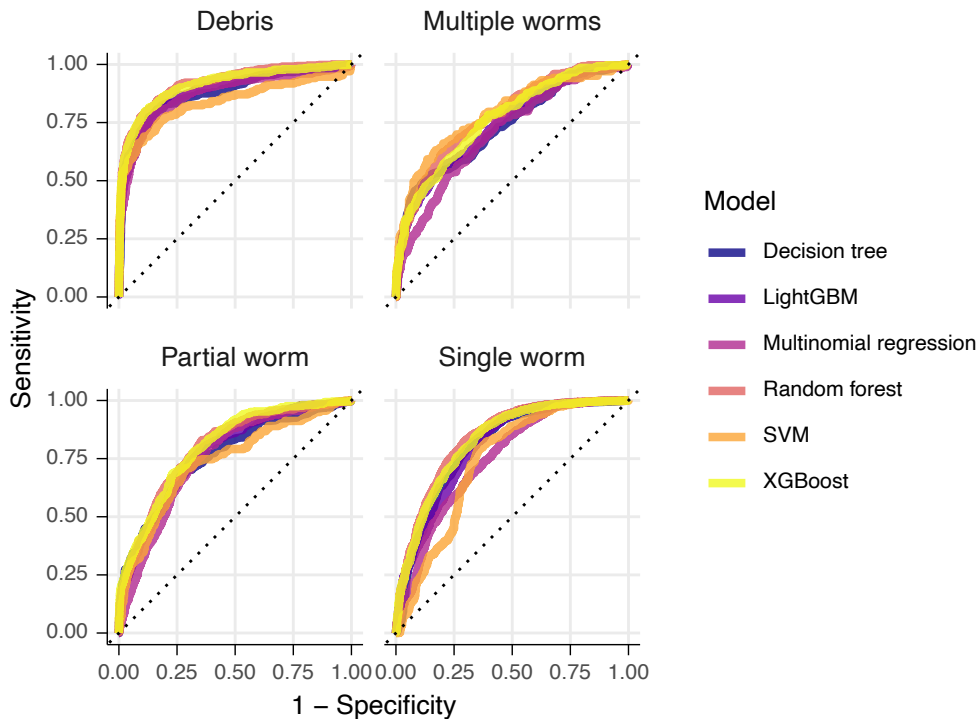**B**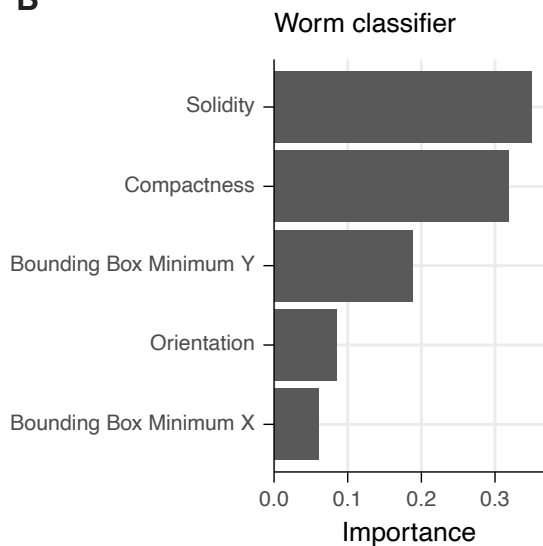**C**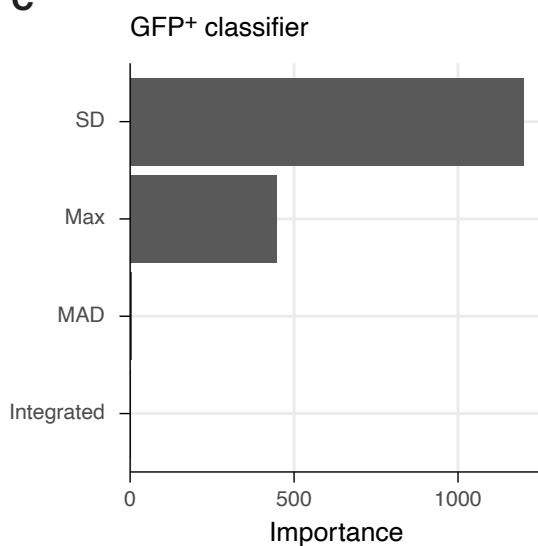

Source: https://www.biorxiv.org/content/10.1101/2022.05.18.492482v1.full.pdf
